# Supplementary material for: Virulence potential of five major pathogenicity islands (SPI-1 to SPI-5) of Salmonella enterica serovar Enteritidis for chickens
Source: Springer Nature journal article supplement (doi:10.1186/1471-2180-9-268), 2009-01-01

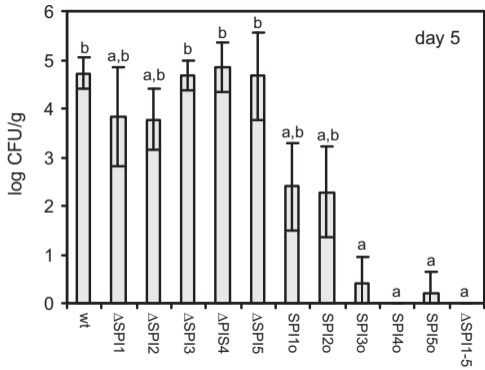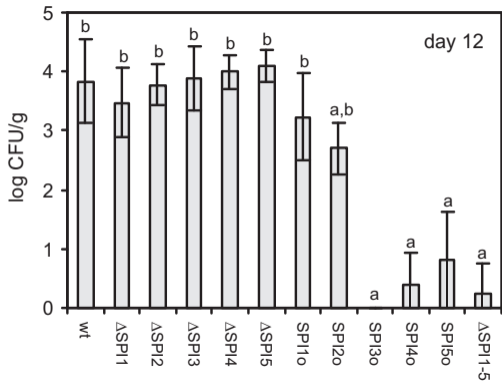

Supplement: 12866_2009_939_MOESM1_ESM.pdf [file 12866_2009_939_MOESM1_ESM.pdf]
